# Supplementary material
Source: PubMed Central journal article supplement (PMC8042775)
Supplement: NIHMS1678159-supplement-Figure_S1.pdf [file NIHMS1678159-supplement-Figure_S1.pdf]

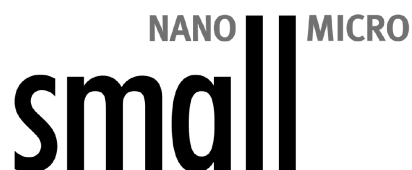

## Supporting Information

for *Small*, DOI: 10.1002/smll.201901427

Preparation and Characterization of Dentin Phosphophoryn-Derived Peptide-Functionalized Lignin Nanoparticles for Enhanced Cellular Uptake

*Patrícia Figueiredo,\* Mika H. Sipponen, Kalle Lintinen, Alexandra Correia, Alexandros Kiriazis, Jari Yli-Kauhaluoma, Monika Österberg, Anne George, Jouni Hirvonen, Mauri A. Kostainen, and Hélder A. Santos\**

## Supporting Information

DOI: 10.1002/ ((please add manuscript number))

Article type: Full Paper

**Preparation and characterization of dentin phosphoryn-derived peptide-functionalized lignin nanoparticles for enhanced cellular uptake**

*Patrícia Figueiredo\**, *Mika H. Sipponen*, *Kalle Lintinen*, *Alexandra Correia*, *Alexandros Kiriazis*, *Jari Yli-Kauhaluoma*, *Monika Österberg*, *Anne George*, *Jouni Hirvonen*, *Mauri A. Kostainen*, *Hélder A. Santos\**

[\*] P. Figueiredo, A. Correia, Dr. A. Kiriazis, Prof. J. Yli-Kauhaluoma, Prof. J. Hirvonen, Prof. H. A. Santos

Drug Research Program

Division of Pharmaceutical Chemistry and Technology

Faculty of Pharmacy

University of Helsinki

FI-00014 Helsinki, Finland

E-mail: [patricia.figueiredo@helsinki.fi](mailto:patricia.figueiredo@helsinki.fi); [helder.santos@helsinki.fi](mailto:helder.santos@helsinki.fi)

Dr. M. Sipponen, Prof. M. Österberg

School of Chemical Engineering

Department of Bioproducts and Biosystems

Aalto University

FI-00076, Aalto, Finland

Dr. K. Lintinen, Prof. M. A. Kostainen

Biohybrid Materials

Department of Bioproducts and Biosystems

Aalto University

FI-00076, Aalto, Finland

Prof. A. George

Brodie Tooth Development Genetics and Regenerative Medicine Research Laboratory

Department of Oral Biology

University of Illinois

Chicago, Illinois 60612, USA

[\*] Prof. H. A. Santos

Helsinki Institute of Life Science (HiLIFE)

University of Helsinki

FI-00014 Helsinki, Finland

**Table S1.** Summary of the reaction ratios used for the carboxylation of the original lignin polymer.

| Sample                    | Original Lignin (mg) | Succinic anhydride (mg) |
|---------------------------|----------------------|-------------------------|
| Carboxylated Lignin (1:2) | 100.0                | 200.0 (42.4 mmol)       |
| Carboxylated Lignin (1:1) | 100.0                | 100.0 (21.2 mmol)       |
| Carboxylated Lignin (2:1) | 100.0                | 50.0 (10.6 mmol)        |
| Carboxylated Lignin (3:1) | 100.0                | 33.3 (7.06 mmol)        |
| Carboxylated Lignin (4:1) | 100.0                | 25.0 (5.3 mmol)         |
| Carboxylated Lignin (5:1) | 100.0                | 20.0 (4.2 mmol)         |

**Table S2.** Description of the main lignin functional groups: IR absorption bands and respective type of vibration.<sup>[1, 2]</sup>

| IR band (cm <sup>-1</sup> ) | Type of vibration                                                                                                     |
|-----------------------------|-----------------------------------------------------------------------------------------------------------------------|
| 3500–3100                   | Stretching vibrations of alcohol and phenol –OH groups involved in hydrogen bonds                                     |
| 2920–2850                   | Stretching vibrations of C–H bonds in methoxy group                                                                   |
| 1720                        | Stretching vibrations of C=O bonds at $\beta$ location and in unconjugated –COOH group                                |
| 1600                        | Stretching vibrations of C=O bonds at $\alpha$ - and $\gamma$ -locations                                              |
| 1512                        | Aromatic ring vibrations                                                                                              |
| 1465                        |                                                                                                                       |
| 1427                        |                                                                                                                       |
| 1269                        | Vibrations of guaiacyl rings and stretching vibrations of C–O bonds                                                   |
| 1215                        |                                                                                                                       |
| 1150                        | Deformation vibrations of C–H bonds in guaiacyl rings                                                                 |
| 1083                        | Deformation vibrations of C–O bonds in secondary alcohols and aliphatic ethers                                        |
| 1033                        | Deformation vibrations of C–H bonds in the aromatic rings and deformation vibrations of C–O bonds in primary alcohols |
| 858                         | Deformation vibrations of C–H bonds in the aromatic rings                                                             |
| 819                         |                                                                                                                       |

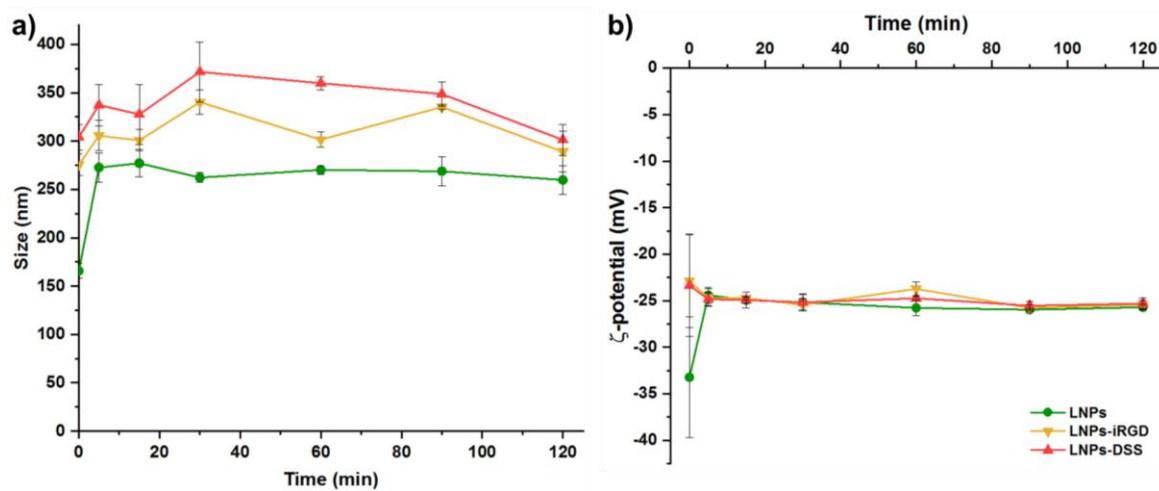

**Figure S1.** Stability of bare and peptide-decorated LNPs in DMEM supplemented with 10% FBS: effect on the size (a) and  $\zeta$ -potential (b) of LNPs, LNPs-iRGD and LNPs-DSS after 2 h incubation at 37 °C. Errors bars represent mean  $\pm$  s.d. ( $n = 3$ ).

**Table S3.** Inhibitory Concentration (IC) values by 50% (IC<sub>50</sub>), 80% (IC<sub>80</sub>) and 90% (IC<sub>90</sub>), after incubation of BZL and BZL-loaded LNPs, LNPs-iRGD and LNPs-DSS with a 2D model of PC3-MM2, MDA-MB-231 and A549 for 6 and 24 h at 37 °C. These values were obtained by means of a concentration response curve by non-linear regression using OriginPro 2018.

|                       |     | PC3-MM2 |           |                |               | MDA-MB-231 |           |                |               | A549 |           |                |               |
|-----------------------|-----|---------|-----------|----------------|---------------|------------|-----------|----------------|---------------|------|-----------|----------------|---------------|
|                       |     | BZL     | BZL@ LNPs | BZL@ LNPs-iRGD | BZL@ LNPs-DSS | BZL        | BZL@ LNPs | BZL@ LNPs-iRGD | BZL@ LNPs-DSS | BZL  | BZL@ LNPs | BZL@ LNPs-iRGD | BZL@ LNPs-DSS |
| IC <sub>50</sub> (μM) | 6h  | 56.4    | -         | -              | 50.7          | -          | -         | -              | -             | 18.2 | 27.0      | 27.4           | 24.1          |
|                       | 24h | 11.4    | 10.8      | 8.5            | 9.3           | 12.7       | 5.4       | 10.2           | 9.4           | 12.5 | 15.4      | 15.9           | 16.1          |
| IC <sub>80</sub> (μM) | 6h  | -       | -         | -              | -             | -          | -         | -              | -             | 29.4 | 35.2      | 34.4           | 37.4          |
|                       | 24h | 17.3    | 17.2      | 15.5           | 16.7          | 20.1       | 22.4      | 26.0           | 22.0          | 25.2 | 29.4      | 29.3           | 28.9          |
| IC <sub>90</sub> (μM) | 6h  | -       | -         | -              | -             | -          | -         | -              | -             | 41.5 | 41.1      | 43.5           | 49.8          |
|                       | 24h | 22.5    | 22.5      | 22.3           | 23.6          | 29.8       | 31.9      | 35.5           | 31.4          | 31.9 | 36.5      | 36.0           | 35.2          |

**Table S4.** Inhibitory Concentration (IC) values by 50% (IC<sub>50</sub>), 80% (IC<sub>80</sub>) and 90% (IC<sub>90</sub>), after incubation of BZL and BZL-loaded LNPs, LNPs-iRGD and LNPs-DSS with a 3D tumor spheroids of PC3-MM2, MDA-MB-231 and A549 for 6, 24 and 48 h at 37 °C. These values were obtained by means of a concentration response curve by non-linear regression using OriginPro 2018.

|                       |     | PC3-MM2 |           |                |               | MDA-MB-231 |           |                |               | A549 |           |                |               |
|-----------------------|-----|---------|-----------|----------------|---------------|------------|-----------|----------------|---------------|------|-----------|----------------|---------------|
|                       |     | BZL     | BZL@ LNPs | BZL@ LNPs-iRGD | BZL@ LNPs-DSS | BZL        | BZL@ LNPs | BZL@ LNPs-iRGD | BZL@ LNPs-DSS | BZL  | BZL@ LNPs | BZL@ LNPs-iRGD | BZL@ LNPs-DSS |
| IC <sub>50</sub> (μM) | 6h  | -       | 33.1      | 45.4           | 31.5          | 11.5       | 18.8      | 19.9           | 18.3          | -    | 42.6      | 53.7           | -             |
|                       | 24h | -       | 45.4      | 22.1           | 21.1          | 17.0       | 17.0      | 15.7           | 19.5          | 20.9 | 20.3      | 20.1           | 24.5          |
|                       | 48h | -       | 31.5      | 20.1           | 20.9          | 15.9       | 20.1      | 20.4           | 21.0          | 21.1 | 18.9      | 20.2           | 24.3          |
| IC <sub>80</sub> (μM) | 6h  | -       | -         | -              | -             | 34.9       | 38.9      | 42.6           | 33.7          | -    | -         | -              | -             |
|                       | 24h | -       | 49.3      | 44.0           | 41.7          | 38.2       | 33.6      | 32.4           | 33.4          | 45.5 | 61.7      | 54.6           | 62.7          |
|                       | 48h | -       | 59.4      | 41.8           | 42.4          | 37.6       | 40.7      | 38.5           | 36.7          | 40.9 | 50.5      | 44.4           | 47.6          |
| IC <sub>90</sub> (μM) | 6h  | -       | -         | -              | -             | 50.6       | 49.7      | 54.9           | 41.3          | -    | -         | -              | -             |
|                       | 24h | -       | -         | -              | -             | 50.1       | 42.2      | 41.2           | 39.9          | -    | -         | -              | -             |
|                       | 48h | -       | -         | 53.3           | 53.7          | 50.1       | 51.5      | 47.5           | 44.2          | 51.0 | 70.2      | 57.7           | 60.1          |

*Materials:* Tetrahydrofuran (THF), 4-(2-hydroxyethyl)-1-piperazineethanesulfonic acid (HEPES) and 2-(*N*-morpholino)ethanesulfonic acid (MES) were purchased from Sigma-Aldrich<sup>®</sup>, USA. Culture flasks were purchased from Corning Inc., USA. Dulbecco's Modified Eagle medium (DMEM), Roswell Park Memorial Institute 1640 medium (RPMI), heat inactivated fetal bovine serum (FBS), L-glutamine (200 mM), non-essential amino acids (NEAA), penicillin (100 IU/mL), streptomycin (100 mg/mL) and trypsin (2.5%) were acquired from HyClone Waltham, USA. Dulbecco's phosphate buffer saline (10× PBS) and Hank's balanced salt solution (10× HBSS) were purchased from Life Technologies Gibco<sup>®</sup> (Carlsbad, CA, USA).

*Cell Culturing:* Human prostate cancer (PC3-MM2), human mammary carcinoma (MDA-MB-231) and human lung carcinoma (A549) cell lines were obtained from American Type Culture Collection (ATCC), USA. The PC3-MM2 and A549 cells were incubated in DMEM, the MDA-MB-231 cells were incubated with RPMI, supplemented with 10% FBS, 1% NEAA, 1% L-glutamine and 1% penicillin-streptomycin in 75 cm<sup>2</sup> flasks. Cells were maintained in an incubator (BB 16 gas incubator, Heraeus Instruments GmbH) at 37 °C, 5% CO<sub>2</sub> and 95% relative humidity.

*Preparation of Lignin Nanoparticles and experimental conditions for BZL quantification***Table S5.** HPLC conditions used in this study for quantification of the loaded and released BZL.

| <b>Benzazulene</b>           |                                                                                       |
|------------------------------|---------------------------------------------------------------------------------------|
| <b>Mobile Phase (v/v)</b>    | Solution A: 0.1% Trifluoroacetic acid (pH 2.0)<br>Solution B: Acetonitrile<br>(35:65) |
| <b>Column</b>                | Kinetex <sup>®</sup> C <sub>18</sub> , 75 mm × 4.6 mm, 2.6 μm<br>(Phenomenex, USA)    |
| <b>Flow Rate (mL/min)</b>    | 1.0                                                                                   |
| <b>Detection (UV, nm)</b>    | 295                                                                                   |
| <b>Injection Volume (μL)</b> | 15                                                                                    |
| <b>Temperature (°C)</b>      | 25                                                                                    |

*Conjugation of the peptides to LNPs:***Table S6.** Relevant information of the peptides for the conjugation reactions.

|                                          | <b>DSS</b>                | <b>iRGD</b> |
|------------------------------------------|---------------------------|-------------|
| <b>Length</b>                            | 22 aa                     | 10 aa       |
| <b>Sequence</b>                          | DSSDSSDSSDSSDSSDSSK K K K | CCRGDKGPDC  |
| <b>Molecular weight</b>                  | 2267.15                   | 1053.34     |
| <b>250 μM of peptide (mg/mg of LNPs)</b> | 0.283 mg                  | 0.132 mg    |

**References**

- [1] B. Ahvazi, É. Cloutier, O. Wojciechowicz, T.-D. Ngo, *ACS Sustainable Chemistry & Engineering* **2016**, *4*, 5090.
- [2] P. Figueiredo, C. Ferro, M. Kemell, Z. Liu, A. Kiriazis, K. Lintinen, H. F. Florindo, J. Yli-Kauhaluoma, J. Hirvonen, M. A. Kostianen, H. A. Santos, *Nanomedicine* **2017**, *12*, 2581.
